# Supplementary material for: Achieving white emission by site-selective occupation of Eu2+ in K2BaSr(PO4)2−x(BO3)x:Eu2+
Source: Royal Society of Chemistry journal article supplement (doi:10.1039/d4tc03517h), 2024-01-01
Supplement: d4tc03517h1.pdf [file d4tc03517h1.pdf]

## Supporting Information

### Achieving the white emission by site-selective occupation of $\text{Eu}^{2+}$ in $\text{K}_2\text{BaSr}(\text{PO}_4)_{2-x}(\text{BO}_3)_x:\text{Eu}^{2+}$

Guo-Dong Xie<sup>a</sup>, Jia-Yong Si<sup>\*a</sup>, Gui-Hua Li<sup>b</sup>, Ge-Mei Cai<sup>\*b</sup>, Zhi-Peng Wang<sup>c</sup> and  
Xiao-Jun Wang<sup>\*d</sup>

<sup>a</sup>College of Mechanical and Electrical Engineering, Central South University of  
Forestry and Technology, Changsha, Hunan 410004, China

<sup>b</sup>School of Materials Science and Engineering, Central South University, Changsha,  
Hunan 410083, China

<sup>c</sup>State Key Laboratory of Advanced Design and Manufacturing for Vehicle Body,  
Hunan University, Changsha, Hunan 410082, China

<sup>d</sup>Department of Physics, Georgia Southern University, Statesboro, Georgia 30460,  
United States

\*Correspondence: sjy98106@163.com (J.-Y. Si) or caigemei@csu.edu.cn (G.-M. Cai) or  
xwang@georgiasouthern.edu (X.-J. Wang).

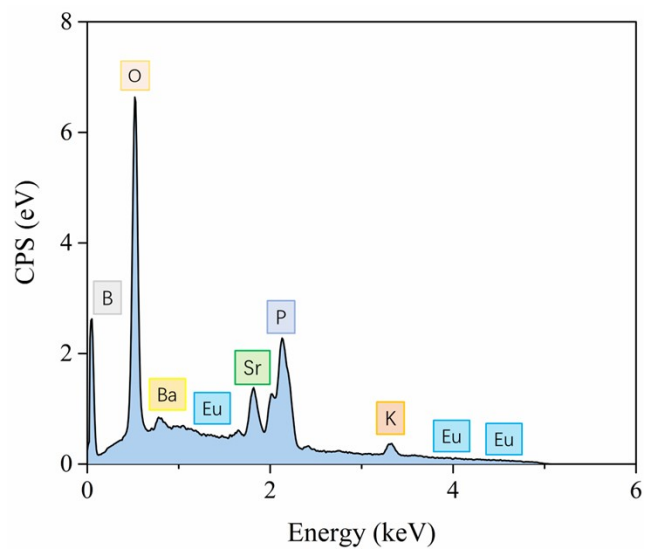

**Figure S1.** The elemental mapping spectrum of  $\text{KBaSP}_{1.8}\text{B}_{0.2}:\text{0.04Eu}^{2+}$ .

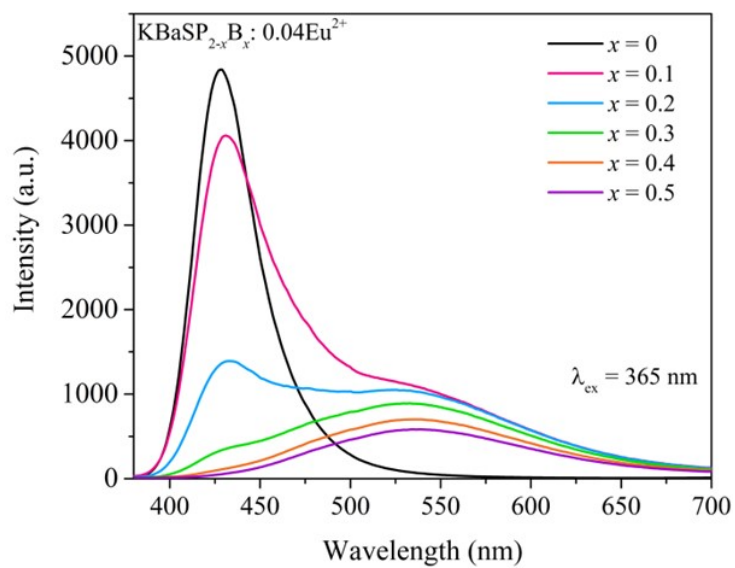

**Figure S2.** The photoluminescence spectra of  $\text{KBaSP}_{2-x}\text{B}_x:\text{0.04Eu}^{2+}$  ( $x = 0, 0.1, 0.2, 0.3, 0.4, 0.5$ ) samples.

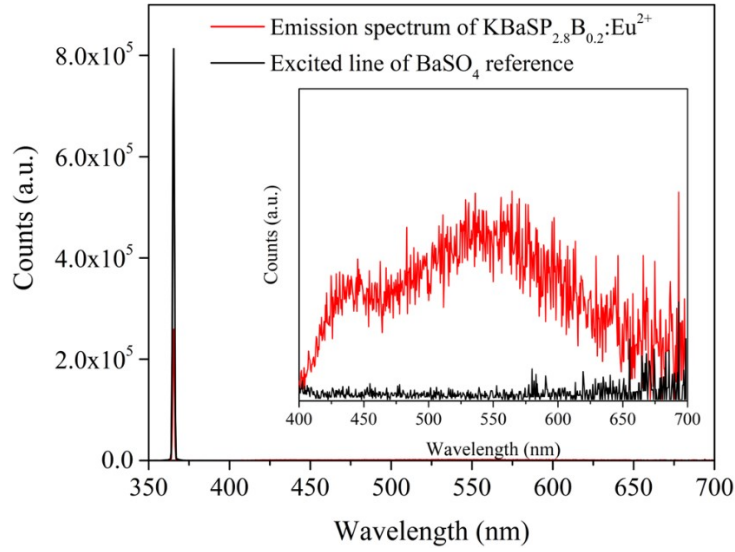

**Figure S3.** Excitation line of BaSO<sub>4</sub> and the emission spectra of KBaSP<sub>1.8</sub>B<sub>0.2</sub>:0.04Eu<sup>2+</sup> sample collected by using an integrating sphere. The inset shows the magnification of the BaSO<sub>4</sub> and  $x = 0.2$  emission spectra.

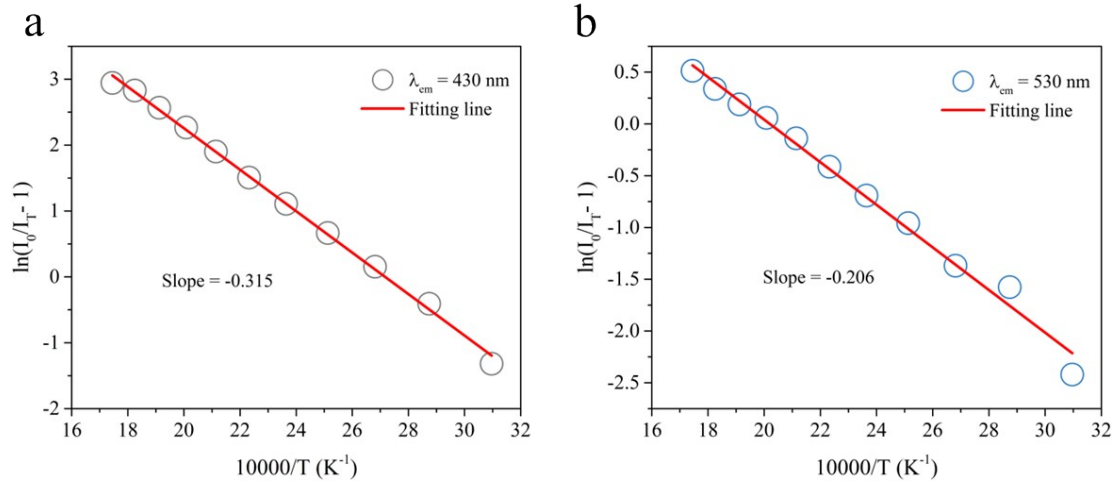

**Figure S4.** The plot of  $\ln(I_0/I_T - 1)$  versus  $10^4/T$  at two emission band centered at 430 nm and 530 nm, respectively.

**Table S1.** Lattice parameters obtained from XRD Rietveld refinements of  $\text{KBaSP}_{1.8}\text{B}_{0.2}:0.04\text{Eu}^{2+}$ .

| Compound            | $\text{KBaSP}_{1.8}\text{B}_{0.2}:0.04\text{Eu}^{2+}$ |
|---------------------|-------------------------------------------------------|
| space group         | $P n m a$                                             |
| a (Å)               | 7.702(5)                                              |
| b (Å)               | 10.002(9)                                             |
| c (Å)               | 5.6422(2)                                             |
| V (Å <sup>3</sup> ) | 434.5(3)                                              |
| $R_{wp}$ (%)        | 8.372                                                 |
| $R_p$ (%)           | 6.011                                                 |

**Table S2** The refined atomic positions of  $\text{KBaSP}_{1.8}\text{B}_{0.2}:0.04\text{Eu}^{2+}$  obtained from the Rietveld analysis.

| Atom | Site | X        | Y        | Z       | $B_{\text{iso}}$ (Å <sup>2</sup> ) | Occ.    |
|------|------|----------|----------|---------|------------------------------------|---------|
| Ba1  | 4c   | -0.00474 | 0.25000  | 0.19835 | 0.06773                            | 0.24750 |
| Sr1  | 4c   | -0.00474 | 0.25000  | 0.19835 | 0.06773                            | 0.24750 |
| P1   | 4c   | 0.23162  | 0.25000  | 0.90553 | 0.0000                             | 0.45000 |
| K1   | 4c   | 0.16367  | 0.25000  | 0.58470 | 0.0000                             | 0.48000 |
| O1   | 8d   | 0.19955  | -0.04708 | 0.33765 | 0.10273                            | 1.00000 |
| O2   | 4c   | 0.02705  | 0.25000  | 0.90451 | 1.34007                            | 0.50000 |
| O3   | 4c   | 0.30910  | 0.25000  | 0.05182 | 0.0000                             | 0.50000 |
| Eu1  | 4c   | -0.00474 | 0.25000  | 0.19835 | 0.06773                            | 0.00500 |
| Eu2  | 4c   | 0.16367  | 0.25000  | 0.58470 | 0.0000                             | 0.02000 |
| B1   | 4c   | 0.23162  | 0.25000  | 0.90553 | 0.0000                             | 0.05000 |

**Table S3.** The chromaticity coordinates of  $\text{KBaSP}_{2-x}\text{B}_x:0.04\text{Eu}^{2+}$  ( $x = 0, 0.1, 0.2, 0.3, 0.4, 0.5$ ) samples excited at 365 nm.

| Compounds                                          | $C_x$  | $C_y$  | CCT(K) |
|----------------------------------------------------|--------|--------|--------|
| $\text{KBaSP}: \text{Eu}^{2+}$                     | 0.1598 | 0.0376 | /      |
| $\text{KBaSP}_{1.9}\text{B}_{0.1}: \text{Eu}^{2+}$ | 0.2164 | 0.1958 | /      |
| $\text{KBaSP}_{1.8}\text{B}_{0.2}: \text{Eu}^{2+}$ | 0.2620 | 0.3066 | 10857  |
| $\text{KBaSP}_{1.7}\text{B}_{0.3}: \text{Eu}^{2+}$ | 0.3071 | 0.4089 | 6381   |
| $\text{KBaSP}_{1.6}\text{B}_{0.4}: \text{Eu}^{2+}$ | 0.3312 | 0.4531 | 5594   |
| $\text{KBaSP}_{1.5}\text{B}_{0.5}: \text{Eu}^{2+}$ | 0.3423 | 0.4708 | 5329   |

The correlated color temperature (CCT) is an important index to evaluate the phosphor performance, and its value can be calculated by McCamy's theoretical formula:

$$CCT = -449n^3 + 3525n^2 - 6823.3n + 5520.33 \quad (1)$$

where  $n = (x - x_e)/(y - y_e)$  is the reciprocal of the slope, and  $x_e$  and  $y_e$  are constants equal to 0.332 and 0.186, respectively.
